# Supplementary material for: Implementation of Multifamily Group Treatment for Veterans With Traumatic Brain Injury
Source: Atypon-hosted journal article supplement (doi:10.1176/appi.ps.001622012), 2013-03-01
Supplement: 534_ds001.pdf [file 534_ds001.pdf]

Table 1: Reasons for exclusion of 59 potential participants related to provider judgment, eligibility criteria or veteran refusal

| Source/Reason                           | Provider judgment: |          | Eligibility criteria not met |           | Veteran refusal/lost to study: |            |
|-----------------------------------------|--------------------|----------|------------------------------|-----------|--------------------------------|------------|
|                                         | Number*            | Percent* | Number**                     | Percent** | Number***                      | Percent*** |
| TBI too severe                          | 10                 | 17%      | —                            | —         | —                              | —          |
| No family identified                    | 6                  | 10%      | —                            | —         | —                              | —          |
| New patient                             | 5                  | 8%       | —                            | —         | —                              | —          |
| Conflict with other treatments/research | 4                  | 7%       | —                            | —         | —                              | —          |
| Family refusal                          | —                  | —        | 5                            | 8%        | —                              | —          |
| Substance abuse                         | —                  | —        | 2                            | 2%        | —                              | —          |
| Schedule conflict                       | —                  | —        | —                            | —         | 5                              | 8%         |
| “Too busy”                              | —                  | —        | —                            | —         | 1                              | 2%         |
| Lost to study                           | —                  | —        | —                            | —         | 7                              | 12%        |
| <b>Total Excluded/Refused</b>           | 25                 | 42%      | 7                            | 21%       | 13                             | 48%        |
| <b>Total Approved/Enrolled</b>          | 34                 | 58%      | 27                           | 79%       | 14                             | 52%        |

\* Numbers and percents are calculated based on the potential pool of 59 veteran participants

\*\* Numbers and percents are calculated based on the 34 veterans approved by providers

\*\*\* Numbers and percents are calculated based on the 27 veterans who were approved by providers and were eligible
